# Supplementary material for: A vertically paired electrode for redox cycling and its application to immunoassays
Source: Royal Society of Chemistry journal article supplement (doi:10.1039/d2an01648f), 2023-01-01

## Supplementary information

# Vertically paired electrode for redox cycling and its application to immunoassays

Jun-Hee Park<sup>a</sup>, Ga-Yeon Lee<sup>a,b</sup>, Zhiqun Song<sup>a</sup>, Ji-Hong Bong<sup>a</sup>, Hong-Rae Kim<sup>a</sup>, Min-Jung Kang<sup>c</sup>, Jae-Chul Pyun<sup>a,\*</sup>

<sup>a</sup> Department of Materials Science and Engineering, Yonsei University, 50 Yonsei-Ro, Seodaemun-Gu, Seoul 03722, Korea.

<sup>b</sup> Electronic Convergence Division, Korea Institute of Ceramic Engineering and Technology (KICET), Jinju, Korea

<sup>c</sup> Korea Institute of Science and Technology (KIST), Seoul, Korea

\*To whom correspondence should be addressed.

**Fig. S1 Electrochemical properties of electrode materials.** (a) CV diagram of PEDOT:PSS electrode at various scan rates under non-redox electrolyte (PCB buffer + 2M H<sub>2</sub>SO<sub>4</sub>) for the estimation of pH effect on double-layer capacitance (C<sub>dl</sub>). (b) Electron transfer rate constant (k<sub>app</sub>) of PEDOT:PSS electrode in a 50 mM ferricyanide and 1 M KCl at pH 1.2 from the peak potential separation ( $\Delta E_p = E_{ap} - E_{cp}$ ) between the cathodic (E<sub>cp</sub>) and anodic peaks (E<sub>ap</sub>) of CV diagram.

(a)

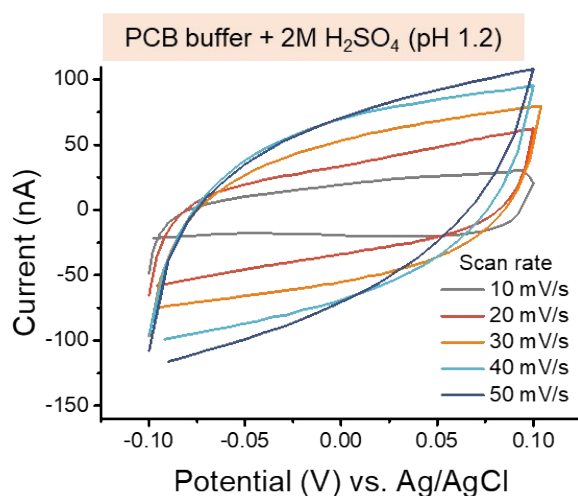

(b)

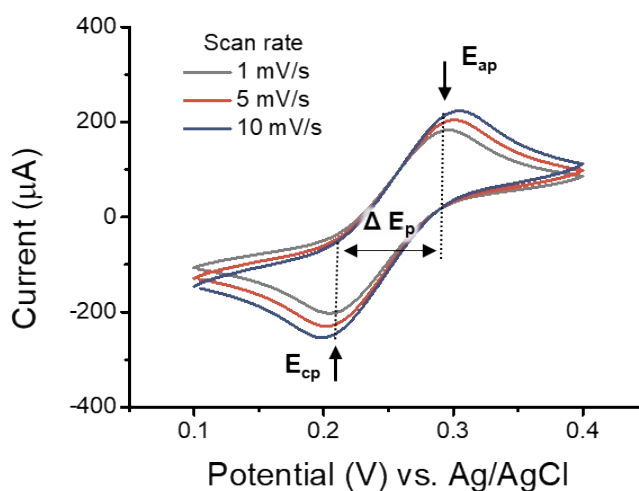

**Fig. S2 Computer simulation for VPE optimization.** (a) Simulation model of VPE finite element method and the current distribution during the redox cycling. (b) Simulation data of redox cycling signal for VPE with different electrode gaps. (c) Simulation data of redox cycling signal for VPE with different electrode pairs.

(a)

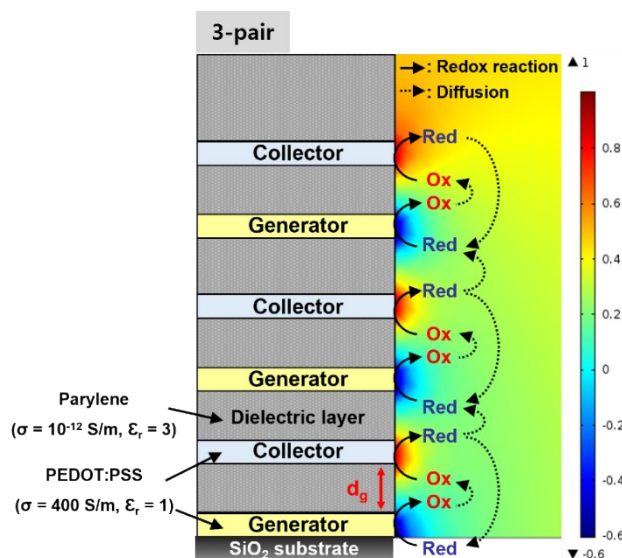

(b)

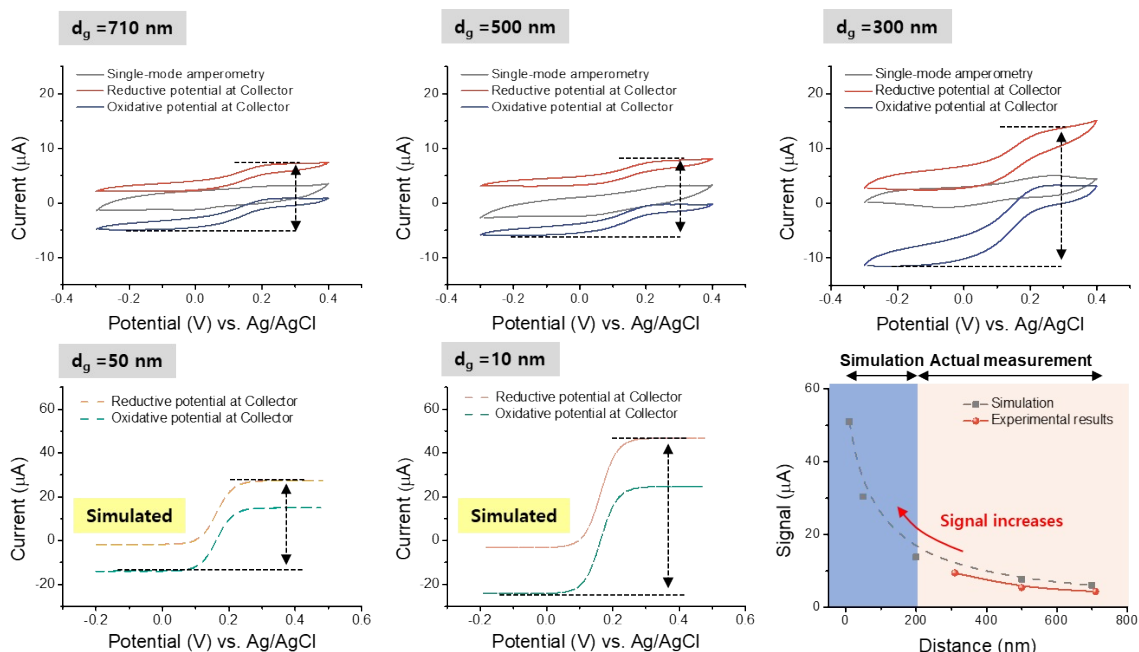

(c)

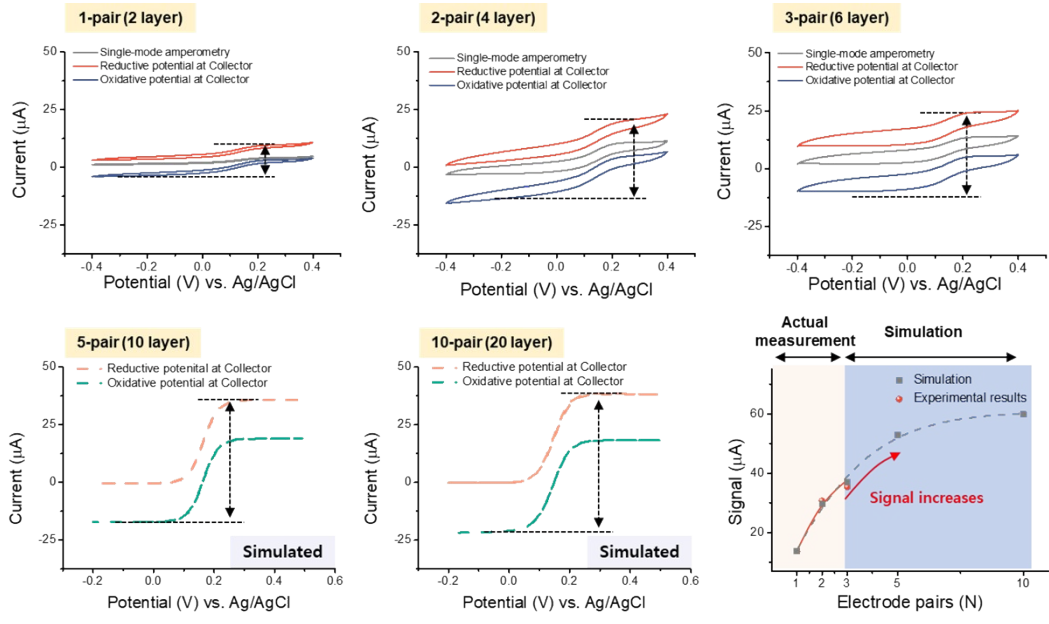

Supplement: d2an01648f1.pdf [file d2an01648f1.pdf]
